# Supplementary material
Source: HighWire-hosted journal article supplement (http://molpharm.aspetjournals.org/highwire/filestream/77218/field_highwire_adjunct_files/0/Supplemental_figure_1_87775.pdf)
Supplement: Supplemental_figure_1_87775.pdf [file Supplemental_figure_1_87775.pdf]

**Supplementary Material for Molecular Pharmacology MOLPHARM/2013/087775**

**Full Title:** Glutamate-induced ATP synthesis: relationship between plasma membrane NCX and EAAT in brain and heart cell models

**Authors:** Simona Magi, Sara Arcangeli, Pasqualina Castaldo, Annamaria Assunta Nasti, Liberato Berrino, Elena Piegari, Renato Bernardini, Salvatore Amoroso, and Vincenzo Lariccia

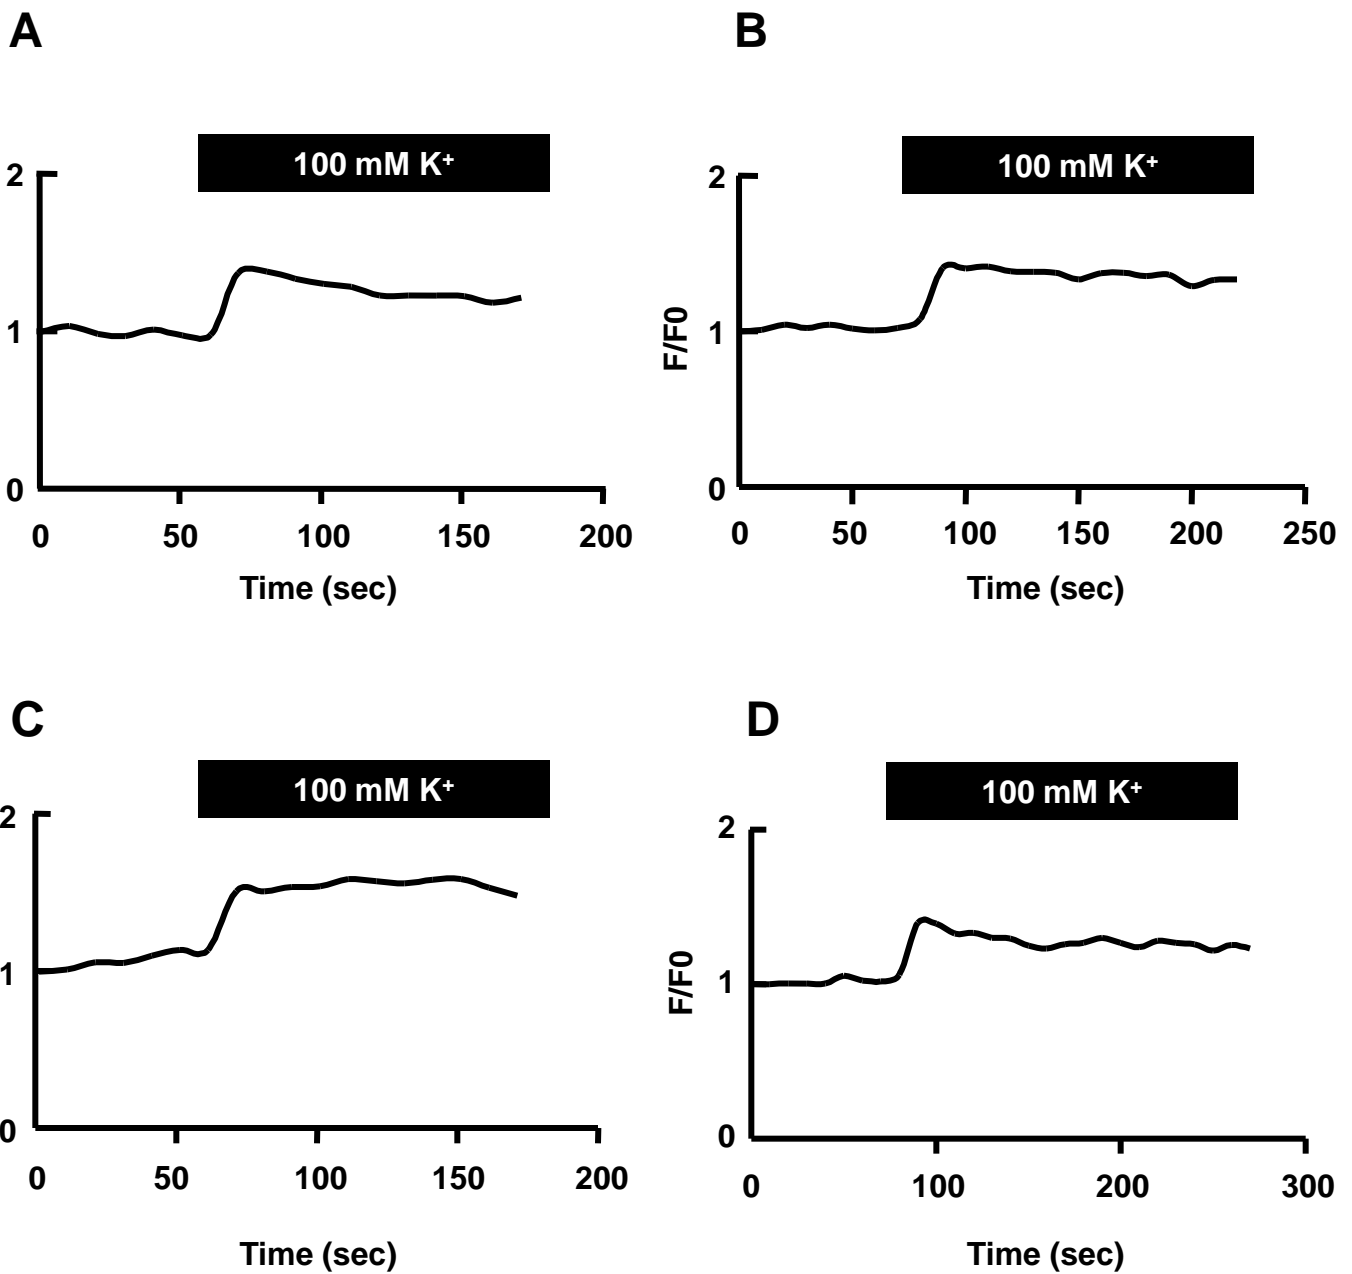

**Fig. S1. Plasma membrane depolarization induced by perfusion with high K<sup>+</sup> extracellular solution.**

Cell membrane potential was monitored in SH-SY5Y (A), C6 (B), H9c2-NCX1 (C) and H9c2-WT (D). Upon perfusing cells with an extracellular solution containing 100 mM K<sup>+</sup>, a stable increase in fluorescence was observed in all the cell type analyzed, indicating plasma-membrane depolarization. Images were acquired at 10 sec intervals. For each cell line, 40-60 cells were analyzed in three different sessions with comparable results.
